# Supplementary material for: Shedding light on intrinsic characteristics and optical properties of novel selenite and tellurite crystals ZrSe2O6, HfSe2O6 and HfTe3O8
Source: Royal Society of Chemistry journal article supplement (doi:10.1039/d2ce01627c), 2023-01-01
Supplement: d2ce01627c1.pdf [file d2ce01627c1.pdf]

## Supporting Information

### Shedding Light on Intrinsic Characteristics and Optical Properties of Novel Selenite and Tellurite Crystals $ZrSe_2O_6$ , $HfSe_2O_6$ and $HfTe_3O_8$

Junai Lv,<sup>a</sup> Qi Li,<sup>a</sup> Xin Guan,<sup>a</sup> Na Lin,<sup>\*a</sup> Jian Zhang,<sup>\*a</sup> Zhitai Jia,<sup>a,b</sup> Xutang Tao.<sup>a</sup>

<sup>a</sup>State Key laboratory of Crystal Material, Shandong University, Jinan, 250100, PR China.

<sup>b</sup>Shandong Research Institute of Industrial Technology, Jinan, Shandong, 250100, PR China.

E-mail: linnakth@gmail.com, Jian.zhang@sdu.edu.cn.

#### Table of contents:

Table S1  $ZrSe_2O_6$  of Geometric parameters.

Table S2  $ZrSe_2O_6$  of Atomic displacement parameters.

Table S3  $HfSe_2O_6$  of Geometric parameters.

Table S4  $HfSe_2O_6$  of Atomic displacement parameters.

Table S5  $HfTe_3O_8$  of Geometric parameters.

Table S6  $HfTe_3O_8$  of Atomic displacement parameters.

Table S1  $ZrSe_2O_6$  of Geometric parameters ( $\text{\AA}^2$ )

|                                          |           |                                         |           |
|------------------------------------------|-----------|-----------------------------------------|-----------|
| O5 <sup>i</sup> —Zr01—O5                 | 180.0 (3) | O5—Zr01—O3 <sup>v</sup>                 | 93.6 (2)  |
| O5 <sup>i</sup> —Zr01—O4 <sup>ii</sup>   | 89.1 (2)  | O4 <sup>ii</sup> —Zr01—O3 <sup>v</sup>  | 89.4 (2)  |
| O5—Zr01—O4 <sup>ii</sup>                 | 90.9 (2)  | O4 <sup>iii</sup> —Zr01—O3 <sup>v</sup> | 90.6 (2)  |
| O5 <sup>i</sup> —Zr01—O4 <sup>iii</sup>  | 90.9 (2)  | O3 <sup>iv</sup> —Zr01—O3 <sup>v</sup>  | 180.0     |
| O5—Zr01—O4 <sup>iii</sup>                | 89.1 (2)  | O3—Se2—O4                               | 102.6 (3) |
| O4 <sup>ii</sup> —Zr01—O4 <sup>iii</sup> | 180.0 (3) | O3—Se2—O5                               | 100.3 (3) |
| O5 <sup>i</sup> —Zr01—O3 <sup>iv</sup>   | 93.6 (2)  | O4—Se2—O5                               | 98.6 (3)  |
| O5—Zr01—O3 <sup>iv</sup>                 | 86.4 (2)  | Se2—O3—Zr01 <sup>vi</sup>               | 142.5 (3) |
| O4 <sup>ii</sup> —Zr01—O3 <sup>iv</sup>  | 90.6 (2)  | Se2—O4—Zr01 <sup>vii</sup>              | 134.0 (3) |
| O4 <sup>iii</sup> —Zr01—O3 <sup>iv</sup> | 89.4 (2)  | Se2—O5—Zr01                             | 151.0 (4) |

|                                       |          |  |  |
|---------------------------------------|----------|--|--|
| O5 <sup>i</sup> —Zr01—O3 <sup>v</sup> | 86.4 (2) |  |  |
|---------------------------------------|----------|--|--|

Symmetry codes: (i) -x, -y+1, -z+1; (ii) x-1, -y+1/2, z-1/2; (iii) -x+1, y+1/2, -z+3/2; (iv) -x, y+1/2, -z+3/2; (v) x, -y+1/2, z-1/2; (vi) -x, y-1/2, -z+3/2; (vii) -x+1, y-1/2, -z+3/2.

Table S2 ZrSe<sub>2</sub>O<sub>6</sub> of Atomic displacement parameters (Å<sup>2</sup>)

|      | $U^{11}$   | $U^{22}$   | $U^{33}$   | $U^{12}$   | $U^{13}$   | $U^{23}$    |
|------|------------|------------|------------|------------|------------|-------------|
| Zr01 | 0.0078 (4) | 0.0077 (4) | 0.0102 (4) | 0.0005 (3) | 0.0005 (3) | -0.0001 (3) |
| Se2  | 0.0137 (4) | 0.0138 (4) | 0.0119 (4) | 0.0027 (3) | 0.0052 (3) | 0.0018 (3)  |
| O3   | 0.024 (3)  | 0.022 (3)  | 0.018 (3)  | -0.007 (2) | 0.009 (2)  | 0.002 (2)   |
| O4   | 0.015 (2)  | 0.019 (3)  | 0.024 (3)  | 0.004 (2)  | 0.001 (2)  | 0.004 (2)   |
| O5   | 0.023 (3)  | 0.017 (3)  | 0.023 (3)  | 0.010 (2)  | 0.001 (2)  | 0.009 (2)   |

Table S3 HfSe<sub>2</sub>O<sub>6</sub> of Geometric parameters (Å<sup>2</sup>)

|                                              |            |                                             |            |
|----------------------------------------------|------------|---------------------------------------------|------------|
| O005 <sup>i</sup> —Hf01—O005                 | 180.0      | O005—Hf01—O004 <sup>v</sup>                 | 90.41 (19) |
| O005 <sup>i</sup> —Hf01—O003 <sup>ii</sup>   | 93.8 (2)   | O003 <sup>ii</sup> —Hf01—O004 <sup>v</sup>  | 90.8 (2)   |
| O005—Hf01—O003 <sup>ii</sup>                 | 86.2 (2)   | O003 <sup>iii</sup> —Hf01—O004 <sup>v</sup> | 89.2 (2)   |
| O005 <sup>i</sup> —Hf01—O003 <sup>iii</sup>  | 86.2 (2)   | O004 <sup>iv</sup> —Hf01—O004 <sup>v</sup>  | 180.0      |
| O005—Hf01—O003 <sup>iii</sup>                | 93.8 (2)   | O005—Se02—O003                              | 100.2 (3)  |
| O003 <sup>ii</sup> —Hf01—O003 <sup>iii</sup> | 180.0      | O005—Se02—O004                              | 97.9 (2)   |
| O005 <sup>i</sup> —Hf01—O004 <sup>iv</sup>   | 90.41 (19) | O003—Se02—O004                              | 102.8 (3)  |
| O005—Hf01—O004 <sup>iv</sup>                 | 89.59 (19) | Se02—O003—Hf01 <sup>vi</sup>                | 142.1 (3)  |
| O003 <sup>ii</sup> —Hf01—O004 <sup>iv</sup>  | 89.2 (2)   | Se02—O004—Hf01 <sup>vii</sup>               | 132.3 (3)  |
| O003 <sup>iii</sup> —Hf01—O004 <sup>iv</sup> | 90.8 (2)   | Se02—O005—Hf01                              | 150.3 (3)  |
| O005 <sup>i</sup> —Hf01—O004 <sup>v</sup>    | 89.59 (19) |                                             |            |

Symmetry codes: (i) -x+2, -y+1, -z+1; (ii) -x+2, y+1/2, -z+1/2; (iii) x, -y+1/2, z+1/2; (iv) -x+1, y+1/2, -z+1/2; (v) x+1, -y+1/2, z+1/2; (vi) -x+2, y-1/2, -z+1/2; (vii) -x+1, y-1/2, -z+1/2.

Table S4 HfSe<sub>2</sub>O<sub>6</sub> of Atomic displacement parameters (Å<sup>2</sup>)

|      | $U^{11}$   | $U^{22}$   | $U^{33}$   | $U^{12}$     | $U^{13}$     | $U^{23}$     |
|------|------------|------------|------------|--------------|--------------|--------------|
| Hf01 | 0.0082 (3) | 0.0016 (2) | 0.0064 (2) | -0.00045 (9) | 0.00021 (15) | -0.00002 (9) |
| Se02 | 0.0128 (3) | 0.0053 (3) | 0.0065 (3) | -0.0025 (2)  | 0.0042 (2)   | -0.0015 (2)  |
| O003 | 0.021 (3)  | 0.016 (2)  | 0.012 (2)  | 0.005 (2)    | 0.008 (2)    | -0.0016 (19) |
| O004 | 0.013 (2)  | 0.011 (2)  | 0.018 (2)  | -0.0051 (17) | -0.0020 (18) | -0.0006 (18) |
| O005 | 0.019 (2)  | 0.008 (2)  | 0.018 (2)  | -0.0062 (18) | 0.001 (2)    | -0.0062 (18) |

Table S5 HfTe<sub>3</sub>O<sub>8</sub> of Geometric parameters.

|                                              |             |                                                |            |
|----------------------------------------------|-------------|------------------------------------------------|------------|
| O003 <sup>i</sup> —Hf01—O003 <sup>ii</sup>   | 180.00 (19) | O003 <sup>iv</sup> —Hf01—O003                  | 91.50 (15) |
| O003 <sup>i</sup> —Hf01—O003 <sup>iii</sup>  | 91.50 (15)  | O003 <sup>v</sup> —Hf01—O003                   | 88.50 (15) |
| O003 <sup>ii</sup> —Hf01—O003 <sup>iii</sup> | 88.50 (15)  | O003—Te02—O003 <sup>vi</sup>                   | 102.2 (3)  |
| O003 <sup>i</sup> —Hf01—O003 <sup>iv</sup>   | 88.50 (15)  | O003—Te02—O004 <sup>vi</sup>                   | 86.4 (2)   |
| O003 <sup>ii</sup> —Hf01—O003 <sup>iv</sup>  | 91.50 (15)  | O003 <sup>vi</sup> —Te02—O004 <sup>vi</sup>    | 80.13 (13) |
| O003 <sup>iii</sup> —Hf01—O003 <sup>iv</sup> | 88.50 (15)  | O003—Te02—O004                                 | 80.13 (13) |
| O003 <sup>i</sup> —Hf01—O003 <sup>v</sup>    | 91.50 (15)  | O003 <sup>vi</sup> —Te02—O004                  | 86.4 (2)   |
| O003 <sup>ii</sup> —Hf01—O003 <sup>v</sup>   | 88.50 (15)  | O004 <sup>vi</sup> —Te02—O004                  | 158.5 (2)  |
| O003 <sup>iii</sup> —Hf01—O003 <sup>v</sup>  | 91.50 (15)  | Te02—O003—Hf01                                 | 137.4 (2)  |
| O003 <sup>iv</sup> —Hf01—O003 <sup>v</sup>   | 180.00 (19) | Te02 <sup>vii</sup> —O004—Te02 <sup>viii</sup> | 117.29 (9) |
| O003 <sup>i</sup> —Hf01—O003                 | 88.50 (15)  | Te02 <sup>vii</sup> —O004—Te02                 | 117.29 (9) |
| O003 <sup>ii</sup> —Hf01—O003                | 91.50 (15)  | Te02 <sup>viii</sup> —O004—Te02                | 117.29 (9) |
| O003 <sup>iii</sup> —Hf01—O003               | 180.0       |                                                |            |

Symmetry codes: (i) -y+1, -z+1, -x+1; (ii) y, z, x; (iii) -x+1, -y+1, -z+1; (iv) z, x, y; (v) -z+1, -x+1, -y+1; (vi) x, -y+1, -z+3/2; (vii) -y+1, z-1/2, -x+3/2; (viii) z, -x+1, -y+3/2.

Table S6 HfTe<sub>3</sub>O<sub>8</sub> of Atomic displacement parameters (Å<sup>2</sup>)

|      | $U^{11}$     | $U^{22}$     | $U^{33}$     | $U^{12}$      | $U^{13}$      | $U^{23}$      |
|------|--------------|--------------|--------------|---------------|---------------|---------------|
| Hf01 | 0.00683 (19) | 0.00683 (19) | 0.00683 (19) | -0.00059 (10) | -0.00059 (10) | -0.00059 (10) |
| Te02 | 0.0043 (3)   | 0.0314 (4)   | 0.0080 (3)   | 0             | 0             | -0.00933 (19) |
| O003 | 0.018 (2)    | 0.0118 (19)  | 0.0138 (19)  | -0.0028 (15)  | -0.0103 (16)  | 0.0003 (15)   |
| O004 | 0.0075 (12)  | 0.0075 (12)  | 0.0075 (12)  | -0.0027 (14)  | -0.0027 (14)  | 0.0027 (14)   |

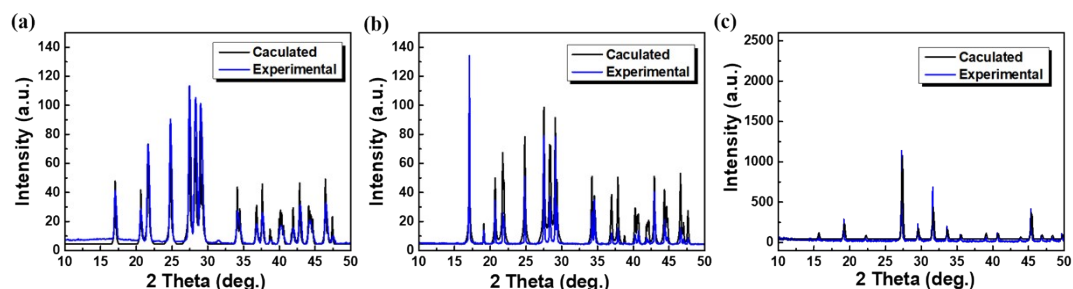

Figure S1. Experimental (blue) and calculated (black) PXRD patterns confirming the phase purity of (a) ZrSe<sub>2</sub>O<sub>6</sub>, (b) HfSe<sub>2</sub>O<sub>6</sub>, and (c) HfTe<sub>3</sub>O<sub>8</sub>.

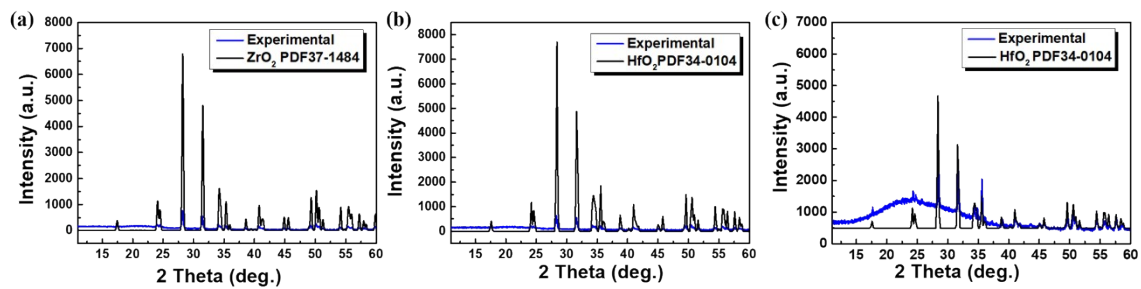

Figure S2. PXRD pattern of the final residual of (a) ZrSe<sub>2</sub>O<sub>6</sub>, (b) HfSe<sub>2</sub>O<sub>6</sub>, and (c) HfTe<sub>3</sub>O<sub>8</sub> obtained by DSC measurement.
